# Supplementary material for: Orthogonal separation and identification of long-chain peptides from scorpion Buthus martensi Karsch venom by using two-dimensional mixed-mode reversed phase-reversed phase chromatography coupled to tandem mass spectrometry
Source: Royal Society of Chemistry journal article supplement (doi:10.1039/c2an36704a), 2013-01-01
Supplement: c2an36704a.pdf [file c2an36704a.pdf]

Orthogonal separation and identification of long-chain peptides from scorpion *Buthus martensi* Karsch venom by using two-dimensional mixed-mode reversed phase-reversed phase chromatography coupled to mass spectrometry

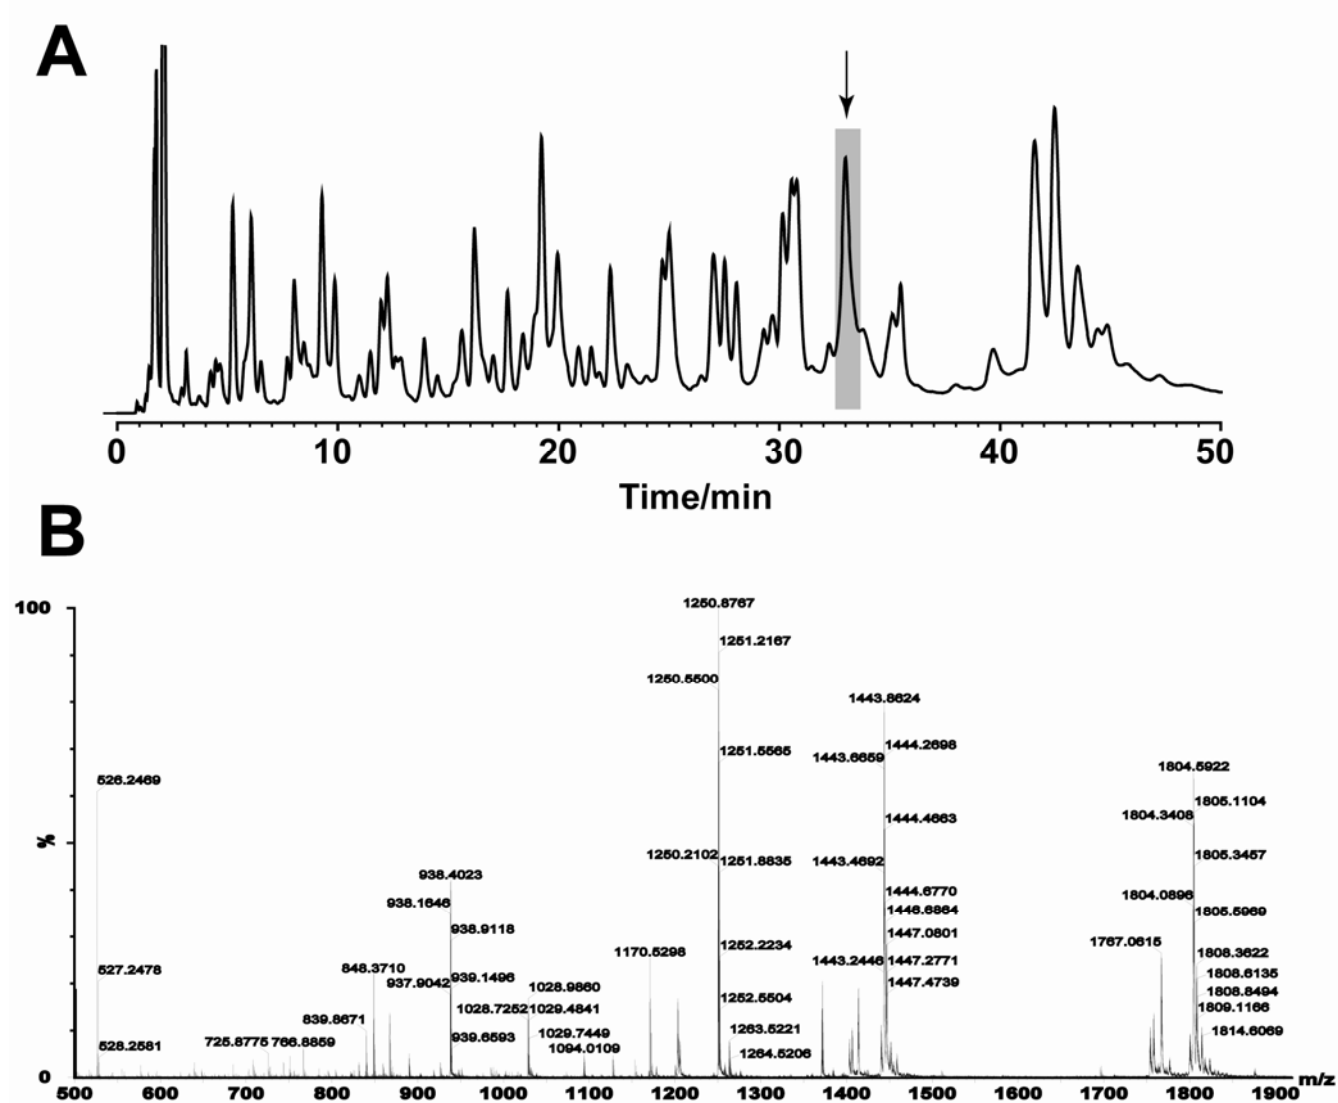

Fig. S1. (A), Sunfire C18 chromatogram of *BmK* venom using pH 1.8. (B), ESI MS spectrum of the collected fraction (arrow denoted).

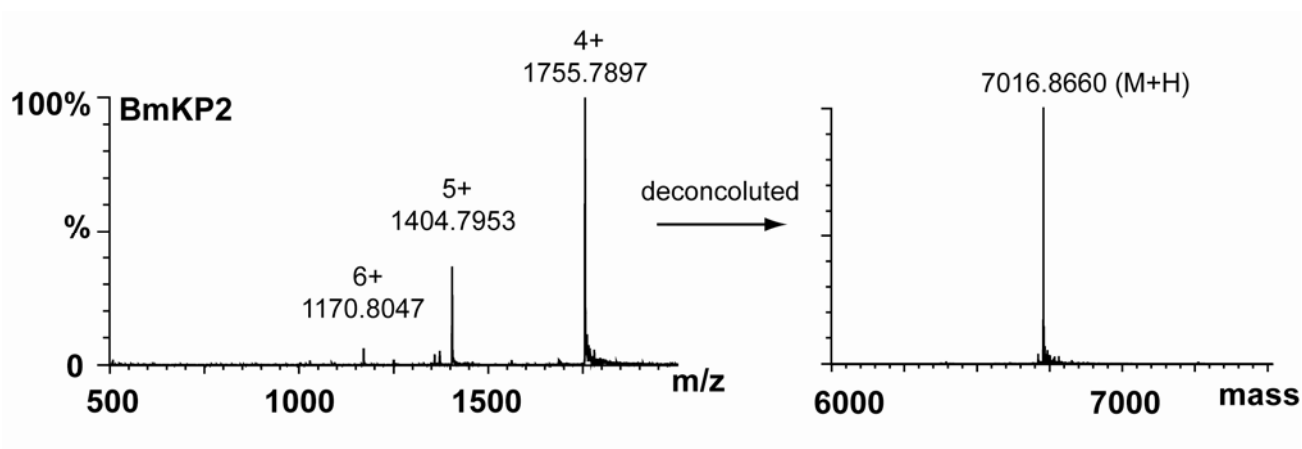

Fig. S2. ESI mass spectrum of native BmKP2 and its monoisotopic mass [M+H] deconvoluted by MaxEnt3 software.

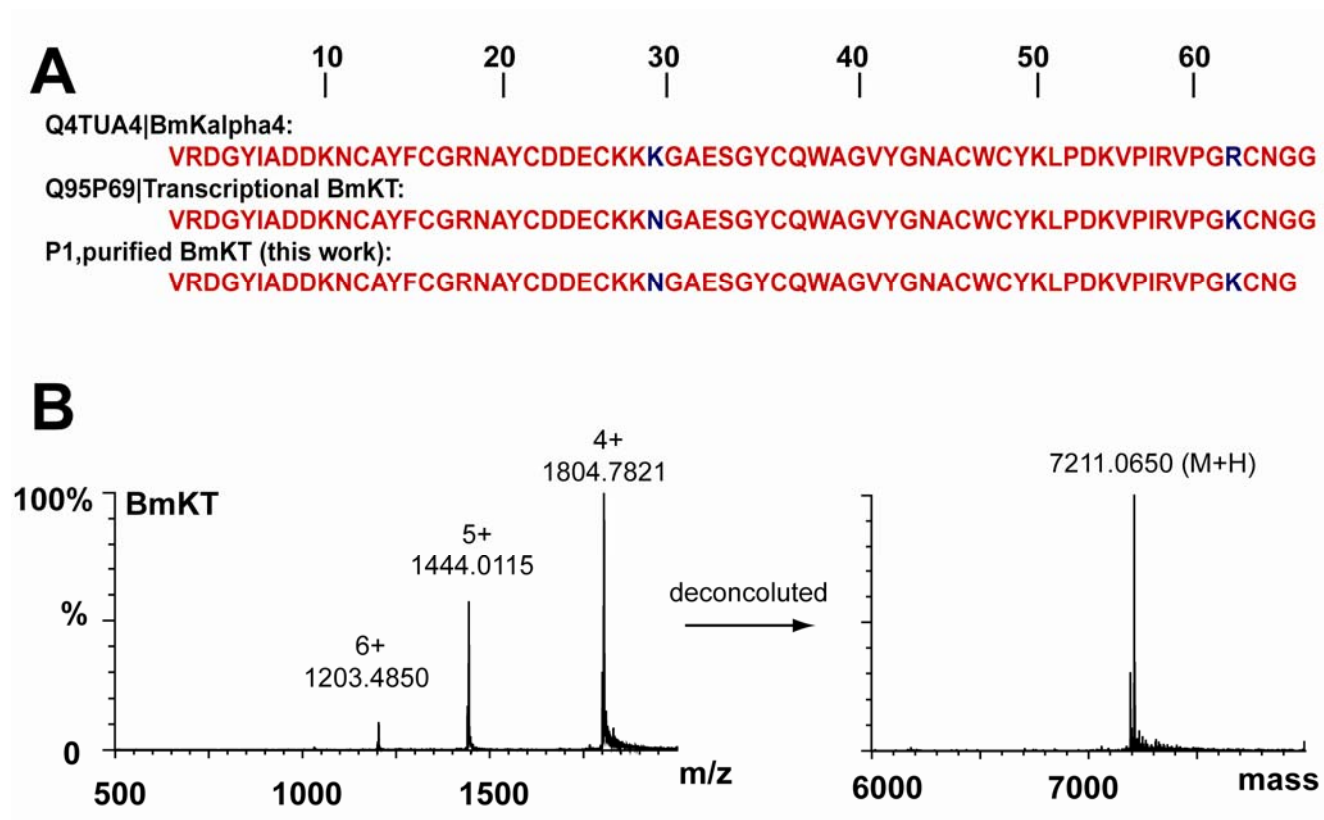

Fig. S3. (A), Sequences comparison of the purified BmKT, transcriptional BmKT and BmKalpha4.

(B), ESI mass spectrum of native BmKT and its monoisotopic mass [M+H] deconvoluted by MaxEnt3 software.

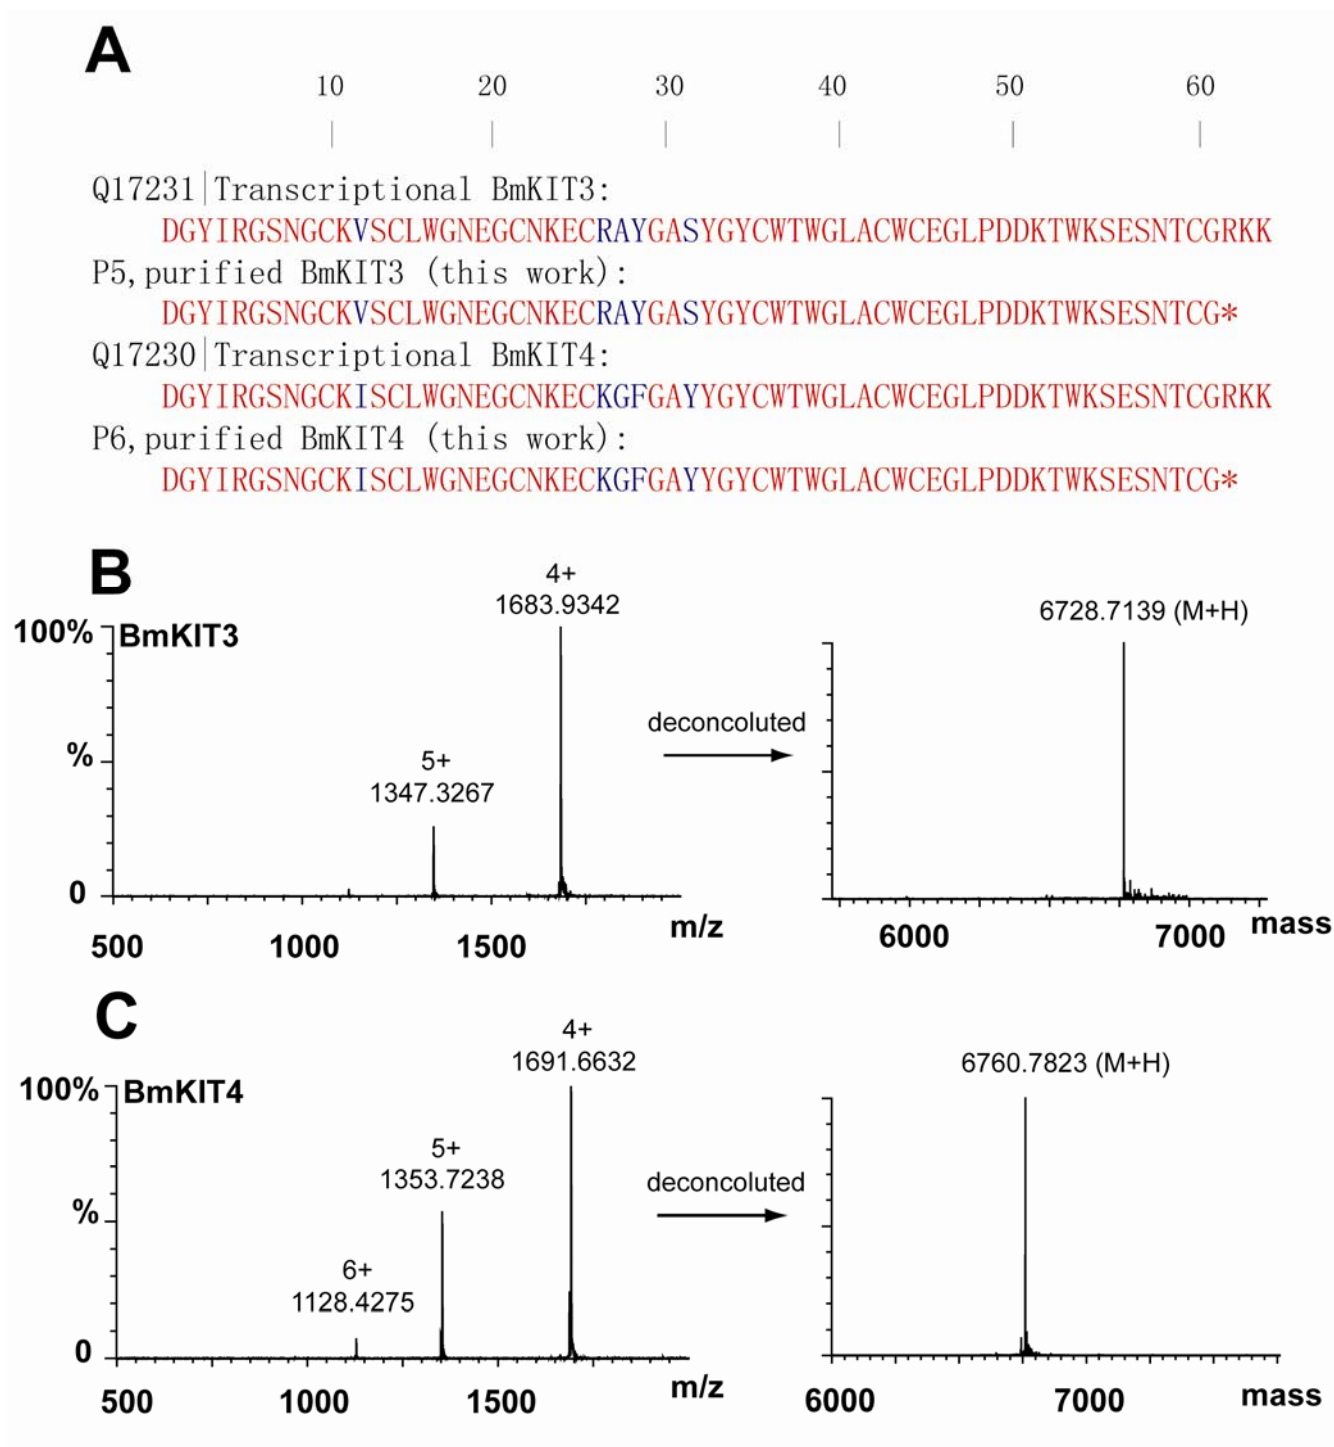

Fig. S4. (A), Sequences comparison of the transcriptional BmKIT3, purified BmKIT3, transcriptional BmKIT4 and purified BmKIT4. (B), ESI mass spectrum of native BmKIT3 and its monoisotopic mass [M+H] deconvoluted by MaxEnt3 software. (C), ESI mass spectrum of native BmKIT4 and its monoisotopic mass [M+H] deconvoluted by MaxEnt3 software.

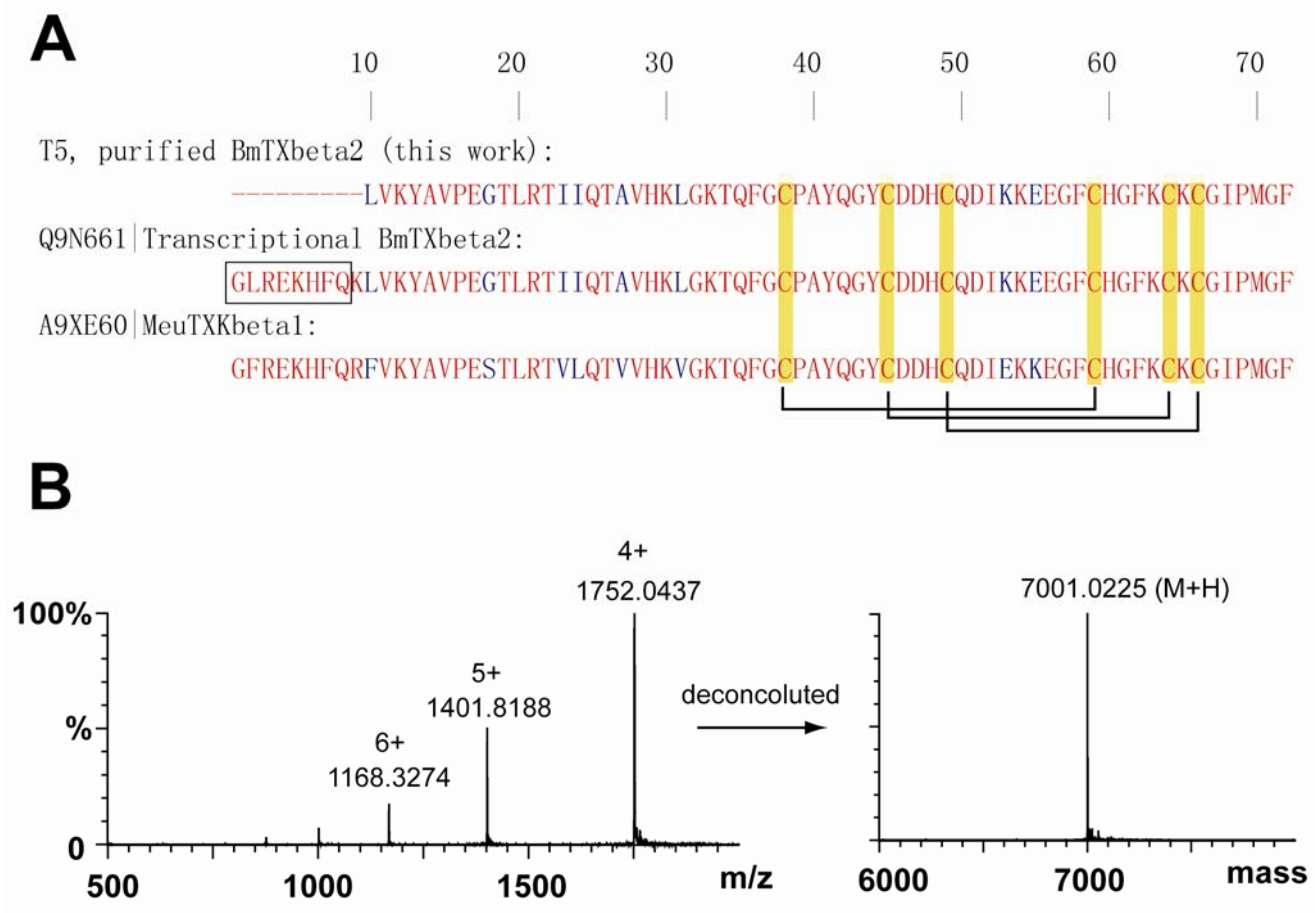

Fig. S5. (A), Sequences comparison of the purified BmTXbeta2, transcriptional BmTXbeta2 and MeuTXKbeta1(from *Buthus eupeus* scorpion). (B), ESI mass spectrum of native BmTXbeta2 and its monoisotopic mass [M+H] deconvoluted by MaxEnt3 software.

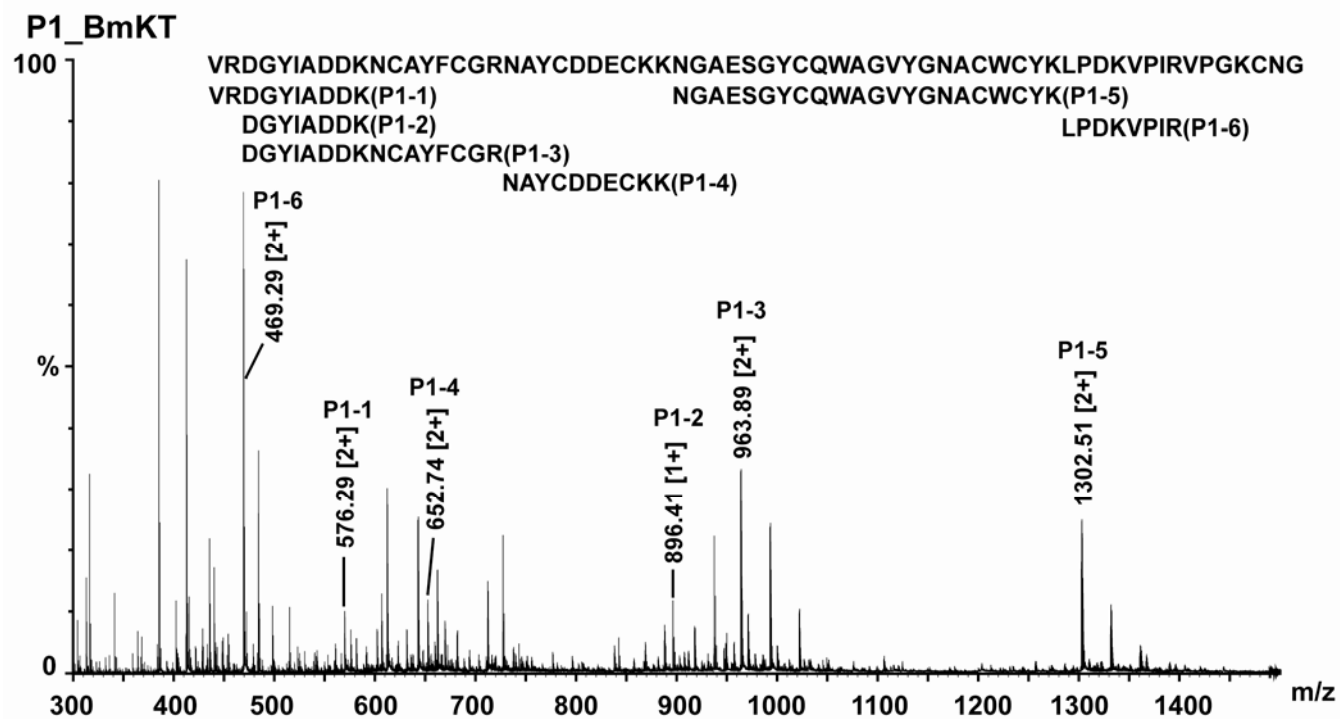

Fig. S6. ESI MS spectrum of tryptic *S*-carboxymethylated BmKT.

### A P3\_Makatoxin1

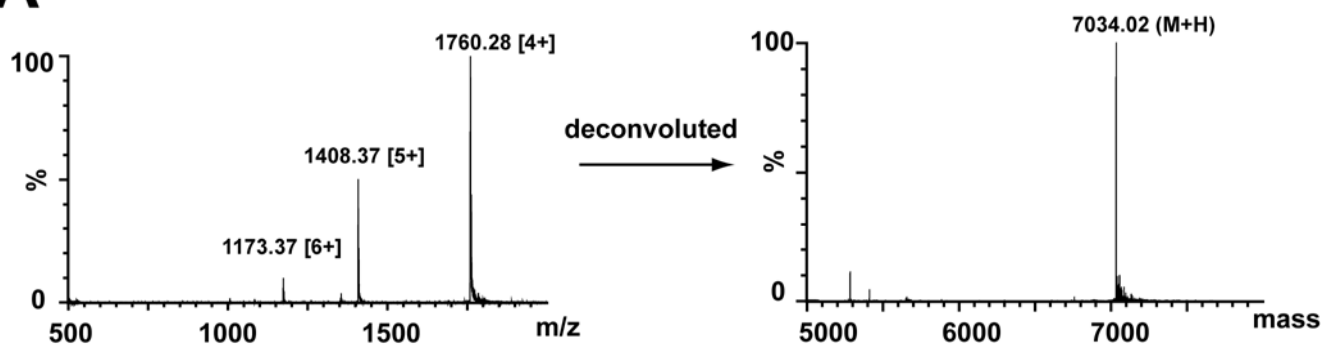

### B

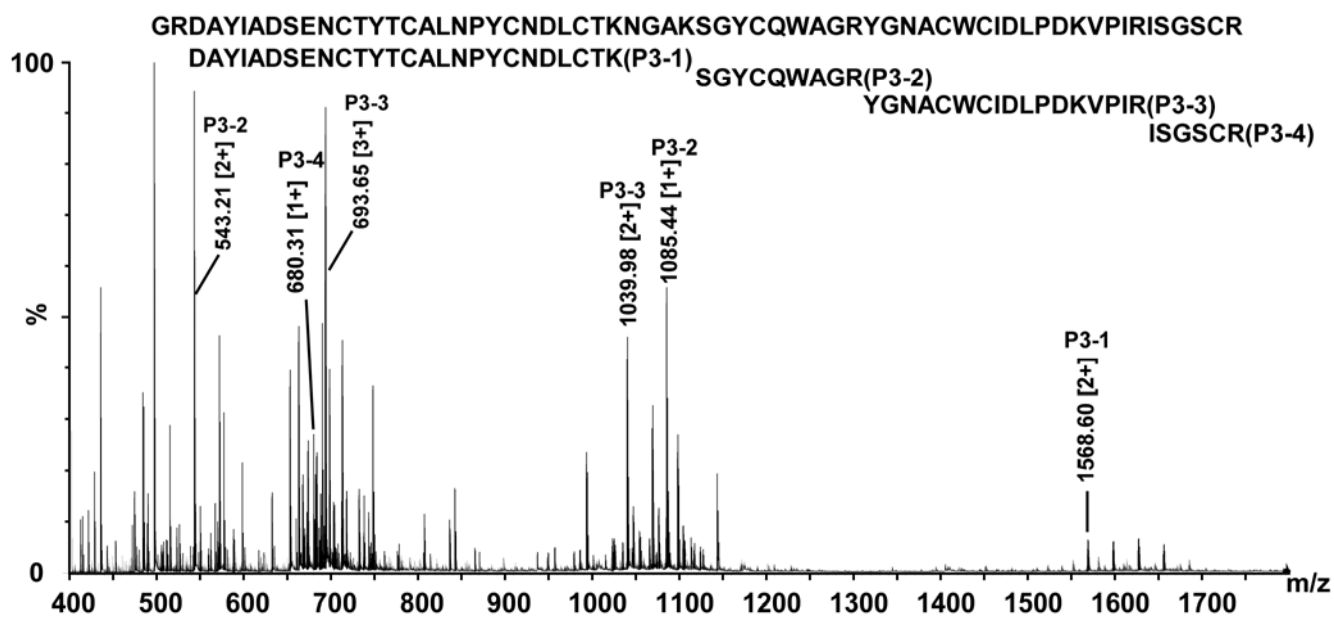

Fig. S7. (A), ESI mass spectrum of native Makatoxin1 and its monoisotopic mass [M+H] deconvoluted by MaxEnt3 software. (B), ESI MS spectrum of tryptic S-carboxymethylated Makatoxin1.

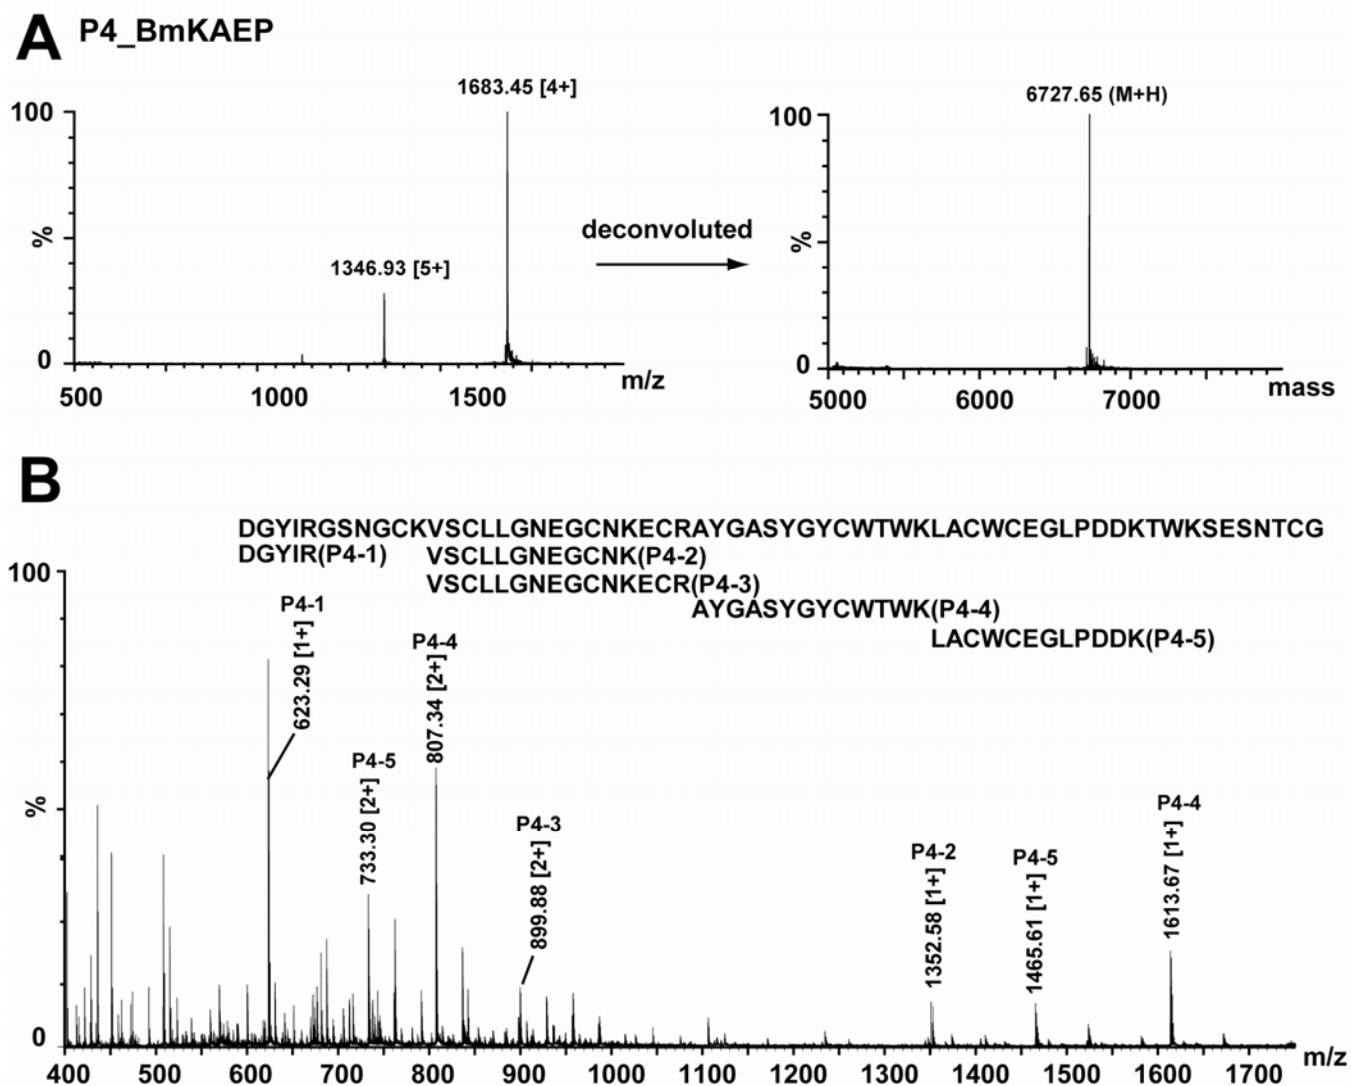

Fig. S8. (A), ESI mass spectrum of native BmKAEP and its monoisotopic mass [M+H] deconvoluted by MaxEnt3 software. (B), ESI MS spectrum of tryptic *S*-carboxymethylated BmKAEP.

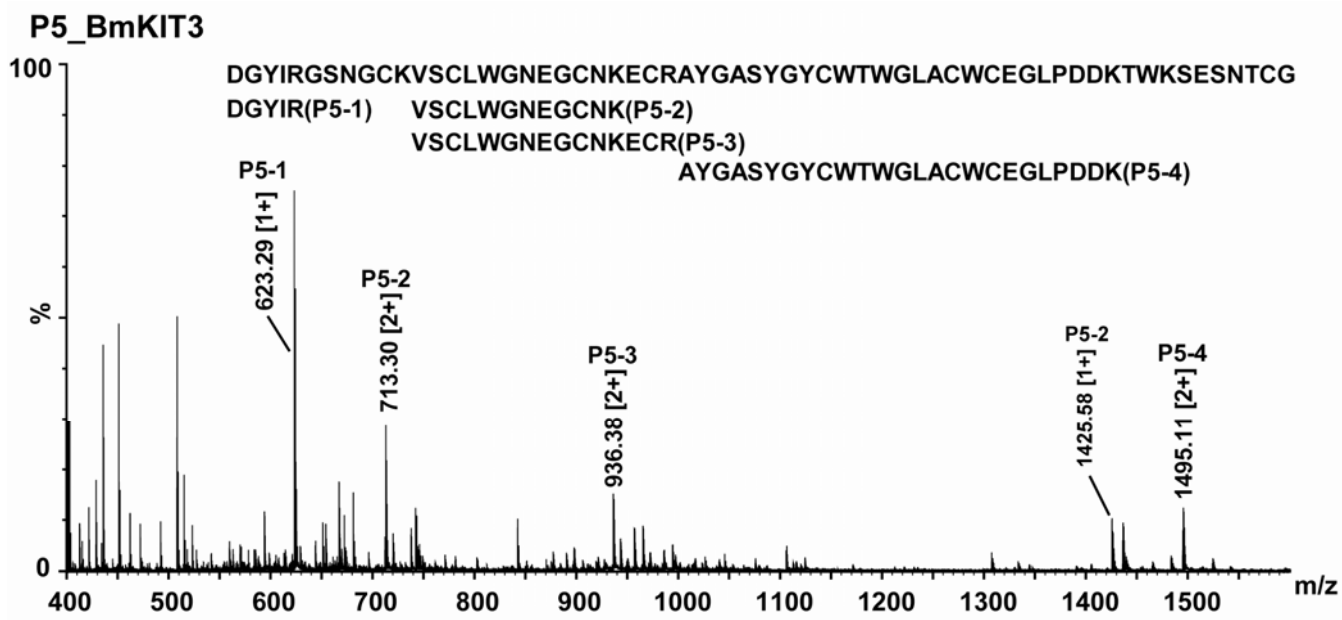

Fig. S9. ESI MS spectrum of tryptic *S*-carboxymethylated BmKIT3.

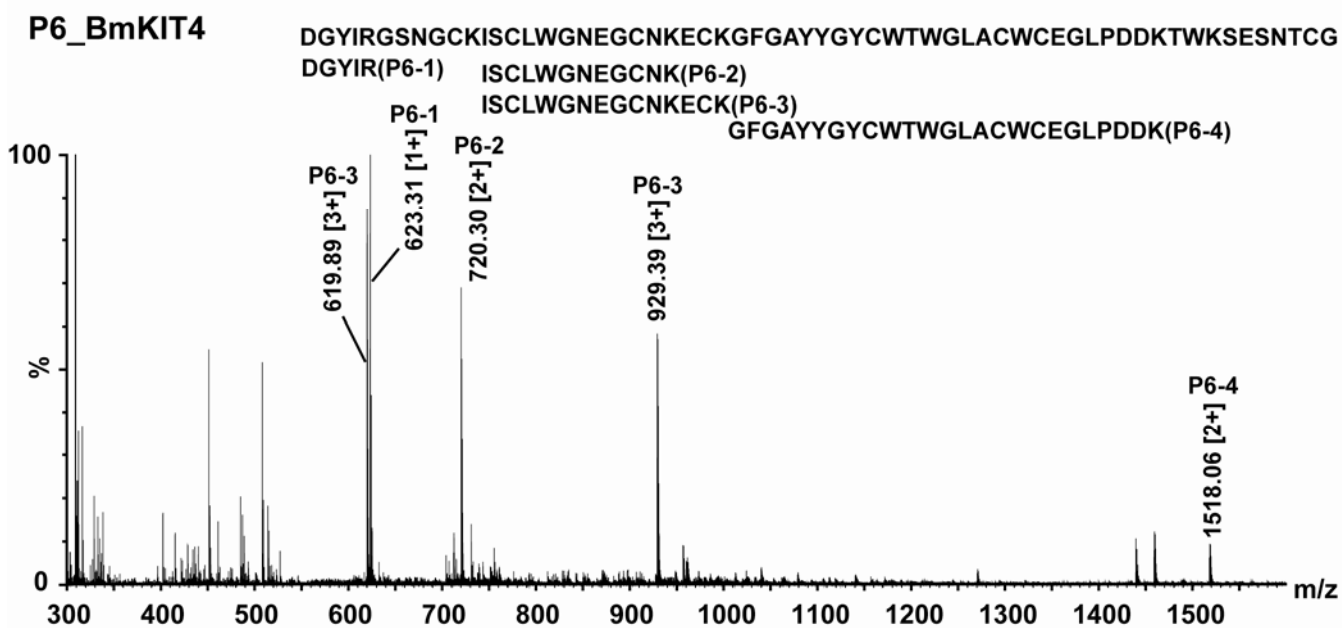

Fig. S10. ESI MS spectrum of tryptic *S*-carboxymethylated BmKIT4.



### A T1\_BmP09

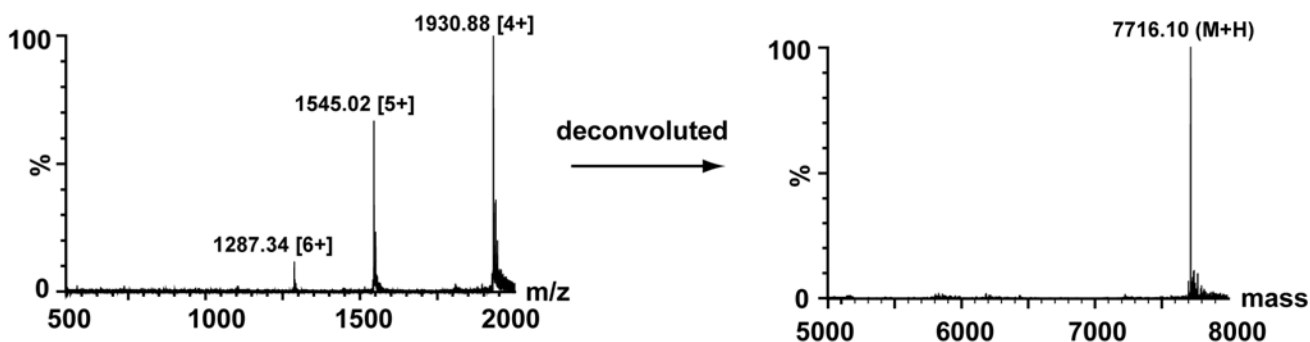

### B

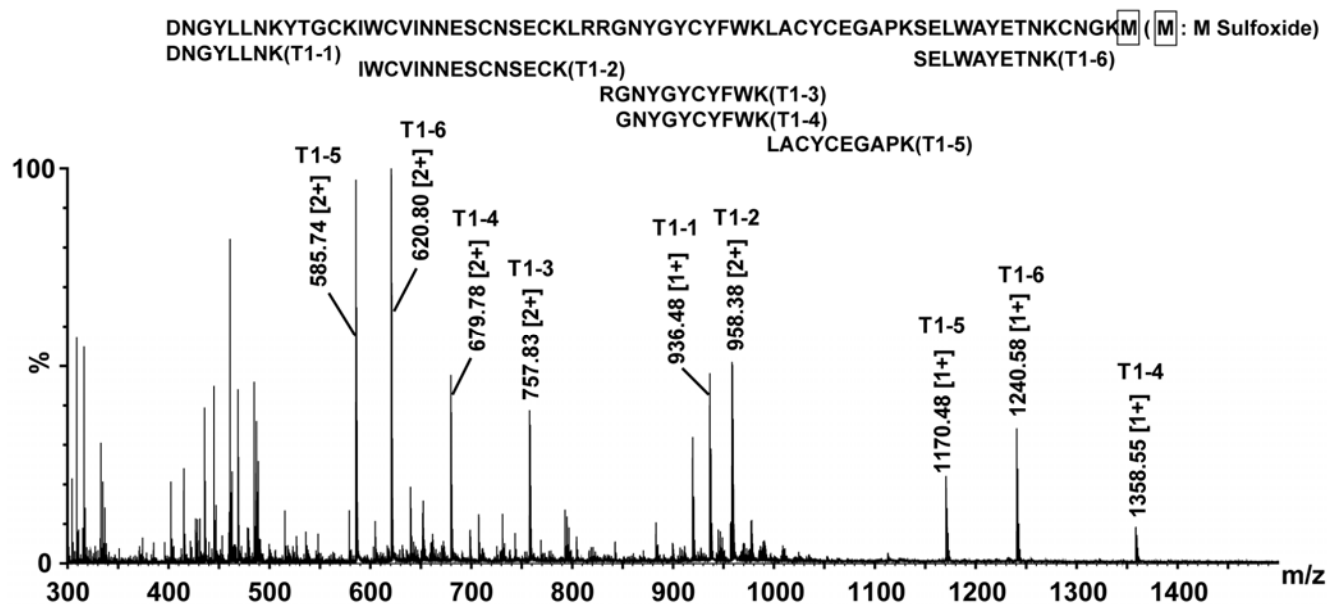

Fig. S11. (A), ESI mass spectrum of native BmP09 and its monoisotopic mass [M+H] deconvoluted by MaxEnt3 software. (B), ESI MS spectrum of tryptic S-carboxymethylated BmP09.

### A T2\_BmKAS1

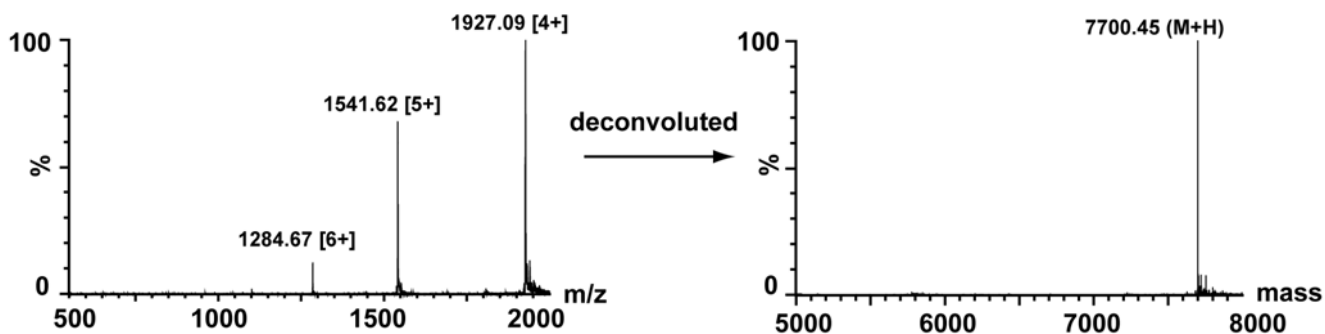

### B

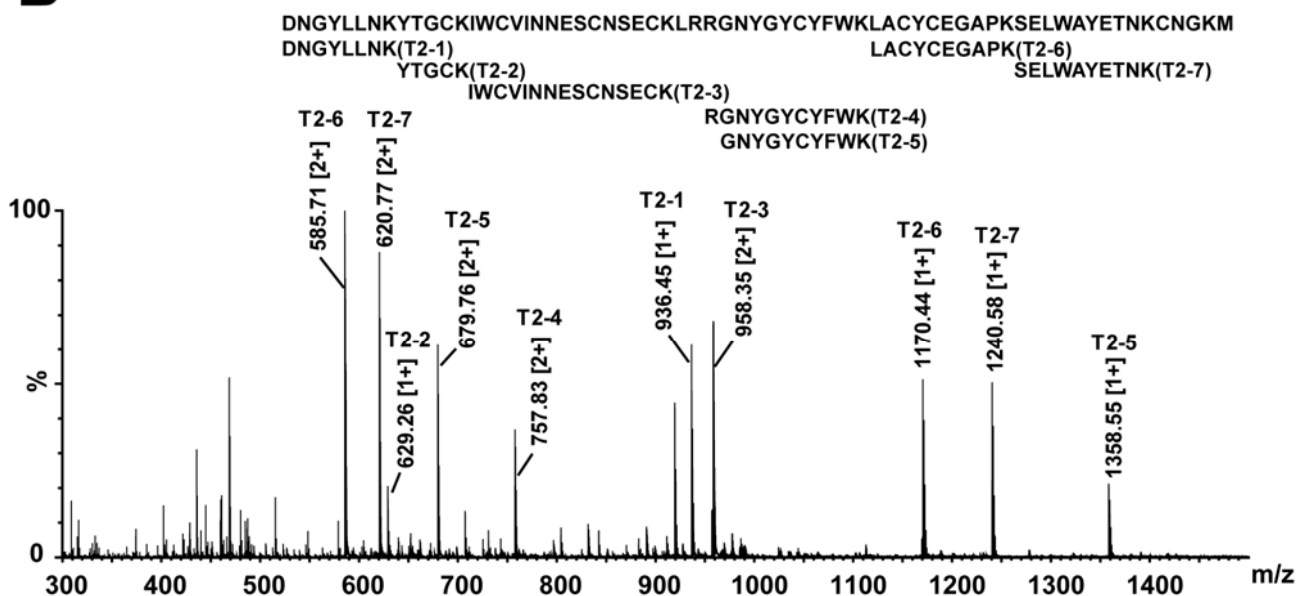

Fig. S12. (A), ESI mass spectrum of native BmKAS1 and its monoisotopic mass [M+H] deconvoluted by MaxEnt3 software. (B), ESI MS spectrum of tryptic *S*-carboxymethylated BmKAS1.

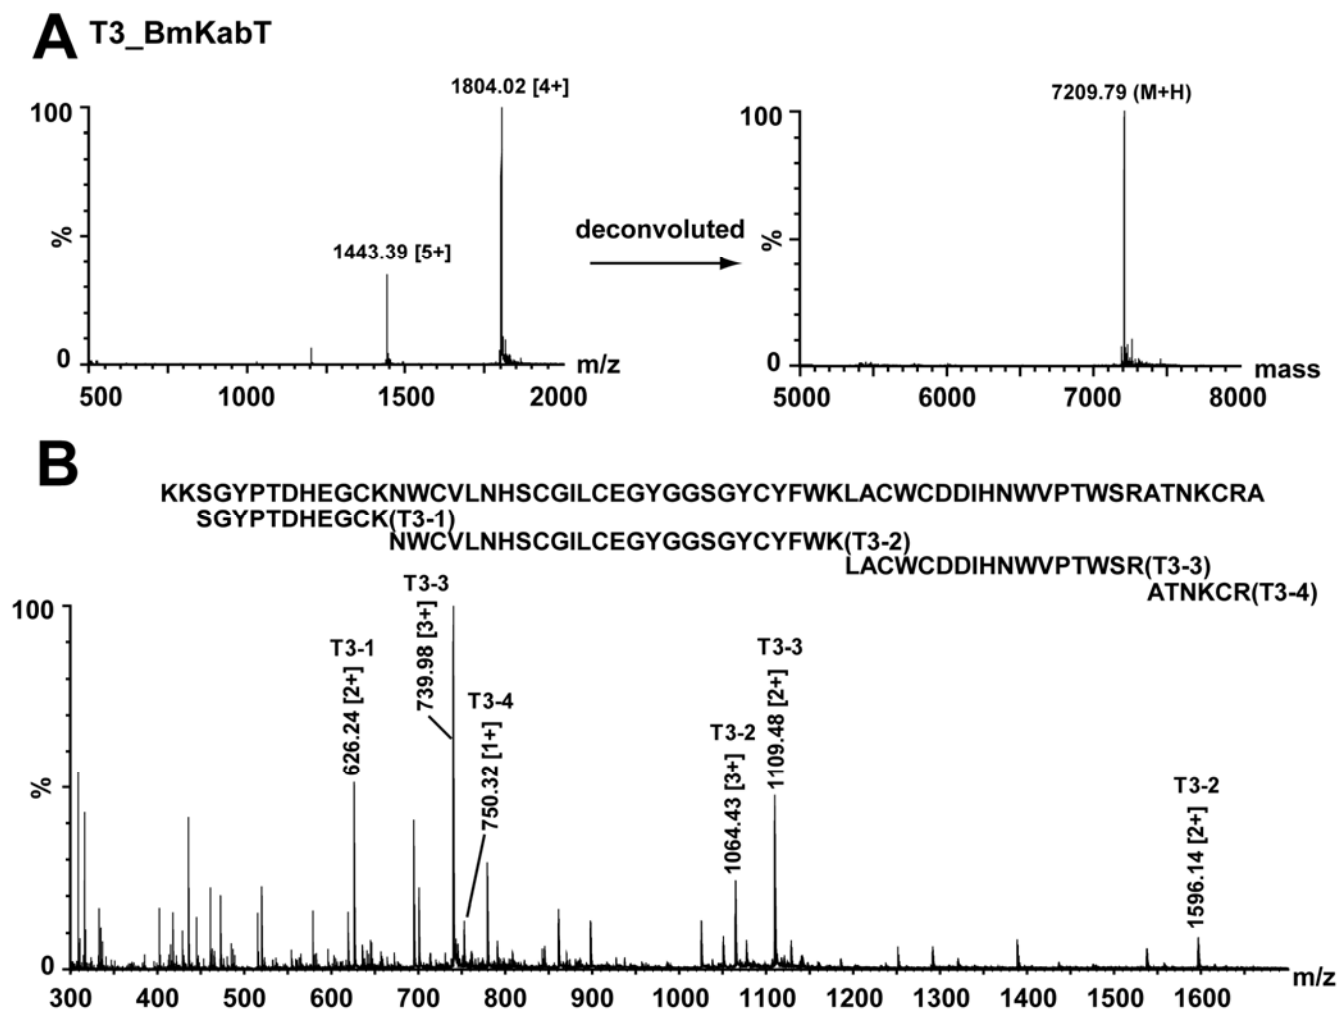

Fig. S13. (A), ESI mass spectrum of native BmKabT and its monoisotopic mass [M+H] deconvoluted by MaxEnt3 software. (B), ESI MS spectrum of tryptic *S*-carboxymethylated BmKabT.

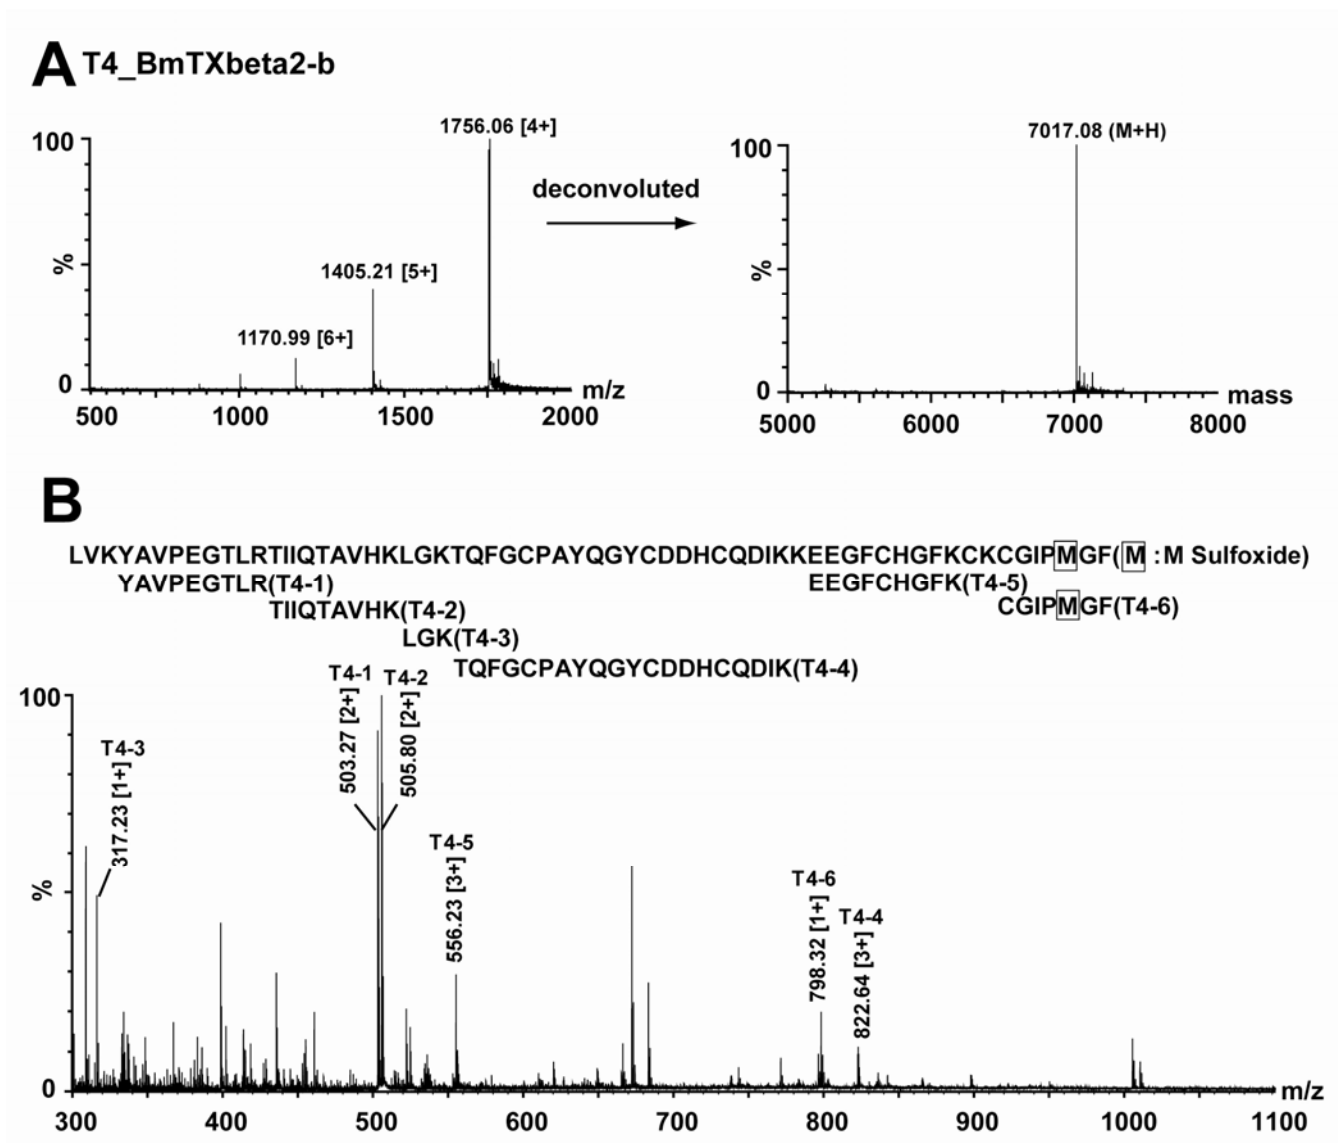

Fig. S14. (A), ESI mass spectrum of native BmTXbeta2-b and its monoisotopic mass [M+H] deconvoluted by MaxEnt3 software. (B), ESI MS spectrum of tryptic *S*-carboxymethylated BmTXbeta2-b.

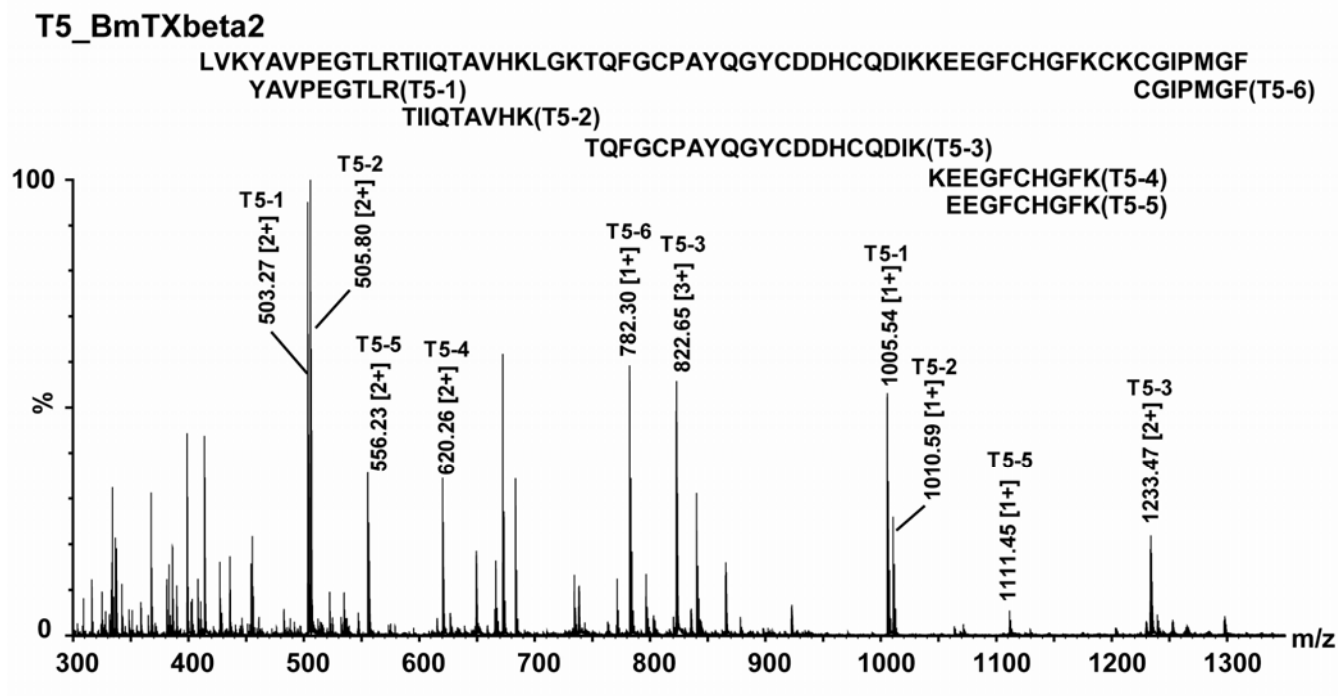

Fig. S15. ESI MS spectrum of tryptic *S*-carboxymethylated BmTXbeta2.

**Table S1.** List of the purified peptides

<sup>a</sup> the monoisotopic molecular mass  $[M+H]^+$  was determined by Q-TOF and the data was processed by MaxEnt3 software

<sup>b</sup> the theoretical monoisotopic molecular mass  $[M+H]^+$

<sup>c</sup> number of disulfide bonds

<sup>d</sup> the observed  $m/z$  and charges when using NanoLC-Q-TOF and <sup>e</sup> the corresponding sequence

<sup>f</sup> Sequence of peptide, (NH<sub>2</sub>) = amidation

<sup>g</sup> the name of peptide and <sup>h</sup> the protein existence level in the database

| MW[M+H] <sup>+</sup><br>meas. <sup>a</sup> (Da) | MW[M+H] <sup>+</sup><br>theor. <sup>b</sup> (Da) | S-S <sup>c</sup> | $m/z$ (charge) <sup>d</sup>                                                               | Observed trypsin fragment <sup>e</sup>                                                                                                          | Full Sequence <sup>f</sup>                                                                      | Peptide<br>Matched <sup>g</sup> | Protein<br>existence <sup>h</sup> |
|-------------------------------------------------|--------------------------------------------------|------------------|-------------------------------------------------------------------------------------------|-------------------------------------------------------------------------------------------------------------------------------------------------|-------------------------------------------------------------------------------------------------|---------------------------------|-----------------------------------|
| 7211.06                                         | 7211.13                                          | 4                | 576.29(2+);<br>896.41(1+);<br>963.89(2+);<br>652.74(2+);<br>1302.51(2+);<br>469.29(2+);   | VRDGYIADDK;<br>DGYIADDK;<br>DGYIADDKNCAYFCGR;<br>NAYCDDECKK;<br>NGAESGYCQWAGVYGNACWCYK;<br>LPDKVPIR;                                            | VRDGYIADDKNCAYFCGRNA<br>YCDDECKKNGAESGYCQWAG<br>VYGNACWCYKLPDKVPIRVP<br>GKCNG(NH <sub>2</sub> ) | BmKT                            | Transcript-<br>level              |
| 7016.86                                         | 7016.08                                          | 4                | 1117.11(3+);<br>1568.61(2+);<br>1170.46(3+);<br>529.22(2+);<br>693.65(3+);<br>690.32(1+); | GRDAYIADSENCTYTCALNPYCNDLCTK;<br>DAYIADSENCTYTCALNPYCNDLCTK;<br>DAYIADSENCTYTCALNPYCNDLCTKNGAK;<br>SGYCQWAGK;<br>YGNACWCIDLDPDKVPIR;<br>ISGPCR; | GRDAYIADSENCTYTCALNPY<br>CNDLCTKNGAKSGYCQWAGK<br>YGNACWCIDLDPDKVPIRISGPC<br>R                   | BmKP2                           | Novel-<br>peptide                 |

|         |         |   |                                                                                        |                                                                                           |                                                                                                 |            |                      |
|---------|---------|---|----------------------------------------------------------------------------------------|-------------------------------------------------------------------------------------------|-------------------------------------------------------------------------------------------------|------------|----------------------|
| 7034.02 | 7034.07 | 4 | 1568.60(2+);<br>543.21(2+);<br>693.65(3+);<br>680.31(1+);                              | DAYIADSENCTYTCALNPYCNDLCTK;<br>SGYCQWAGR;<br>YGNACWCIDLDPKVPPIR;<br>ISGSCR;               | GRDAYIADSENCTYTCALNPY<br>CNDLCTKNGAKSGYCQWAGR<br>YGNACWCIDLDPKVPPIRISGSC<br>R                   | Makatoxin1 | Protein-<br>level    |
| 6727.65 | 6727.84 | 4 | 623.29(1+);<br>1352.58(1+);<br>899.88(2+);<br>807.34(2+);<br>733.30(2+);               | DGYIR;<br>VSCLLGNEGCNK;<br>VSCLLGNEGCNKECR;<br>AYGASYGYCWTWK;<br>LACWCEGLPDDK;            | DGYIRGSNGCKVSCLLGNEGC<br>NKECRAYGASYGYCWTWKL<br>ACWCEGLPDDKTWKSESNTC<br>G(NH <sub>2</sub> )     | BmKAEP     | Protein-<br>level    |
| 6728.71 | 6728.76 | 4 | 623.29(1+);<br>713.30(2+);<br>936.38(2+);<br>1495.11(2+);                              | DGYIR;<br>VSCLWGNEGCNK;<br>VSCLWGNEGCNKECR;<br>AYGASYGYCWTWGLACWCEGLPDDK;                 | DGYIRGSNGCKVSCLWGNEGC<br>CNKECRAYGASYGYCWTWG<br>LACWCEGLPDDKTWKSESNT<br>CG(NH <sub>2</sub> )    | BmKIT3     | Transcript-<br>level |
| 6760.78 | 6760.80 | 4 | 623.31(1+);<br>720.30(2+);<br>929.39(3+);<br>1518.06(2+);                              | DGYIR;<br>ISCLWGNEGCNK;<br>ISCLWGNEGCNKECK;<br>GFGAYYGYCWTWGLACWCEGLPDDK;                 | DGYIRGSNGCKISCLWGNEGC<br>NKECKGFGAYYGYCWTWGL<br>ACWCEGLPDDKTWKSESNTC<br>G(NH <sub>2</sub> )     | BmKIT4     | Transcript-<br>level |
| 7716.10 | 7716.39 | 4 | 936.48(1+);<br>958.38(2+);<br>757.83(2+);<br>679.78(2+);<br>585.74(2+);<br>620.80(2+); | DNGYLLNK;<br>IWCVINNECNSECK;<br>RGNYGYCYFWK;<br>GNYGYCYFWK;<br>LACYCEGAPK;<br>SELWAYETNK; | DNGYLLNKYTGCKIWCVINNE<br>SCNSECKLRRGNYGYCYFWK<br>LACYCEGAPKSELWAYETNK<br>CNGKX (X: M Sulfoxide) | BmP09      | Protein-<br>level    |

|         |         |   |                                                                                                       |                                                                                                      |                                                                                             |                 |                      |
|---------|---------|---|-------------------------------------------------------------------------------------------------------|------------------------------------------------------------------------------------------------------|---------------------------------------------------------------------------------------------|-----------------|----------------------|
| 7700.45 | 7700.40 | 4 | 936.45(1+);<br>629.26(1+);<br>958.35(2+);<br>757.83(2+);<br>679.76(2+);<br>585.71(2+);<br>620.77(2+); | DNGYLLNK;<br>YTGCK;<br>IWCVINNESCNSECK;<br>RGNYGYCYFWK;<br>GNYGYCYFWK;<br>LACYCEGAPK;<br>SELWAYETNK; | DNGYLLNKYTGCKIWCVINNE<br>SCNSECKLRRGNYGYCYFWK<br>LACYCEGAPKSELWAYETNK<br>CNGKM              | BmKAS-1         | Protein-<br>level    |
| 7209.79 | 7209.12 | 4 | 626.24(2+);<br>1064.43(3+);<br>739.98(3+);<br>750.32(1+);                                             | SGYPTDHEGCK;<br>NWCVLNHSCEGYGGSGYCYFWK;<br>LACWCDDIHNWVPTWSR;<br>ATNKCR;                             | KKSGYPTDHEGCKNWCVLNH<br>SCGILCEGYGGSGYCYFWKLA<br>CWCDDIHNWVPTWSRATNKC<br>RA                 | BmKabT          | Protein-<br>level    |
| 7017.08 | 7017.32 | 3 | 503.27(2+);<br>505.80(2+);<br>317.23(1+);<br>822.64(3+);<br>556.23(2+);<br>798.32(1+);                | YAVPEGTLR;<br>TIIQTAVHK;<br>LGK;<br>TQFGCPAYQGYCDDHCQDIK;<br>EEGFCHGFK;<br>CGIPXGF;                  | LVKYAVPEGTLRTIIQTAVHKL<br>GKTQFGCPAYQGYCDDHCQDI<br>KKEEGFCHGFKCKCGIPXGF(X<br>: M Sulfoxide) | BmTXbeta2-<br>b | Transcript-<br>level |
| 7001.02 | 7001.33 | 3 | 503.27(2+);<br>505.80(2+);<br>822.65(3+);<br>620.62(2+);<br>556.23(2+);<br>782.30(1+);                | YAVPEGTLR;<br>TIIQTAVHK;<br>TQFGCPAYQGYCDDHCQDIK;<br>KEEGFCHGFK;<br>EEGFCHGFK;<br>CGIPMGF;           | LVKYAVPEGTLRTIIQTAVHKL<br>GKTQFGCPAYQGYCDDHCQDI<br>KKEEGFCHGFKCKCGIPMGF                     | BmTXbeta2       | Transcript-<br>level |
